# Supplementary material for: Fluorinated carbon fiber as a novel nanocarrier for cancer chemo-photothermal therapy
Source: Royal Society of Chemistry journal article supplement (doi:10.1039/c7tb01155e), 2017-01-01
Supplement: c7tb01155e1.pdf [file c7tb01155e1.pdf]

## Electronic supplementary information

### **Fluorinated carbon fiber as a novel nanocarrier for cancer chemo-photothermal therapy**

Lu Sun, Peiwei Gong\*, Xicheng Liu, Minghui Pang, Meng Tian, Jinyu Chen, Jiuyao  
Du, Zhe Liu\*

Institute of Anticancer Agents Development and Theranostic Application, The Key  
Laboratory of Life-Organic Analysis and Key Laboratory of Pharmaceutical  
Intermediates and Analysis of Natural Medicine, Department of Chemistry and  
Chemical Engineering, Qufu Normal University, Qufu 273165, P. R. China

#### **1. FTIR spectra of HFC at different designed ratio**

On the basis of previous work about the phase equilibria of KOH and NaOH,  
when the weight ratio of NaOH is 43.1% the eutectic point of the mixture of NaOH  
and KOH at around 170 °C and the lowest freezing point at about 174.5 °C. In view of  
the fact that oxygen groups on FC could fast decompose when the temperature more  
than 200 °C, then 180 °C was setted as the reaction temperature meanwhile the weight  
ratio of NaOH is 43.1% of the mixed alkali.

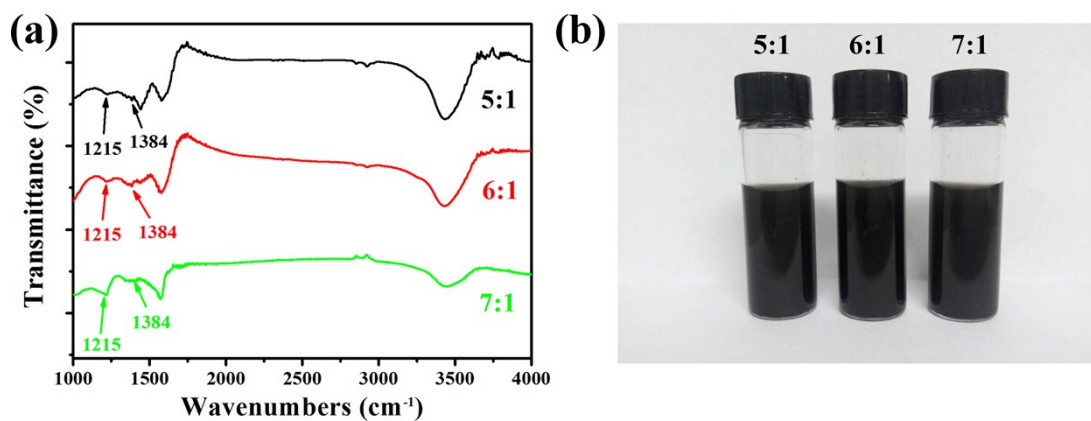

Fig. S1. Chemical composition analysis (a) FTIR spectra of HFC at different designed ratio. (b) The digital images of HFC dispersed in water.

According to the previous exploration experiment, the weight ratio of alkali/FC at 5, 6 and 7 were selected to synthesize HFC, and meanwhile the high fluoride content was maintained. Fig. S1 (a) showed FTIR spectra of HFC at three designed ratio, which clearly indicated that besides covalent C–F bond (1215 cm<sup>-1</sup>), C–O bond in the form of C–OH (1384 cm<sup>-1</sup>) also can be found on the structure of HFC. It was worth noting that the three designed ratio displayed the same results of HFC, then the weight ratio of alkali/FC at 5 was selected. HFC showed finer hydrophilicity and dispersibility after mixed alkali treatment, the digital images of HFC for three designed ratio dispersed in water ( Fig. S1 (b)).

## 2. UV-vis absorption spectra of HFC and FCO

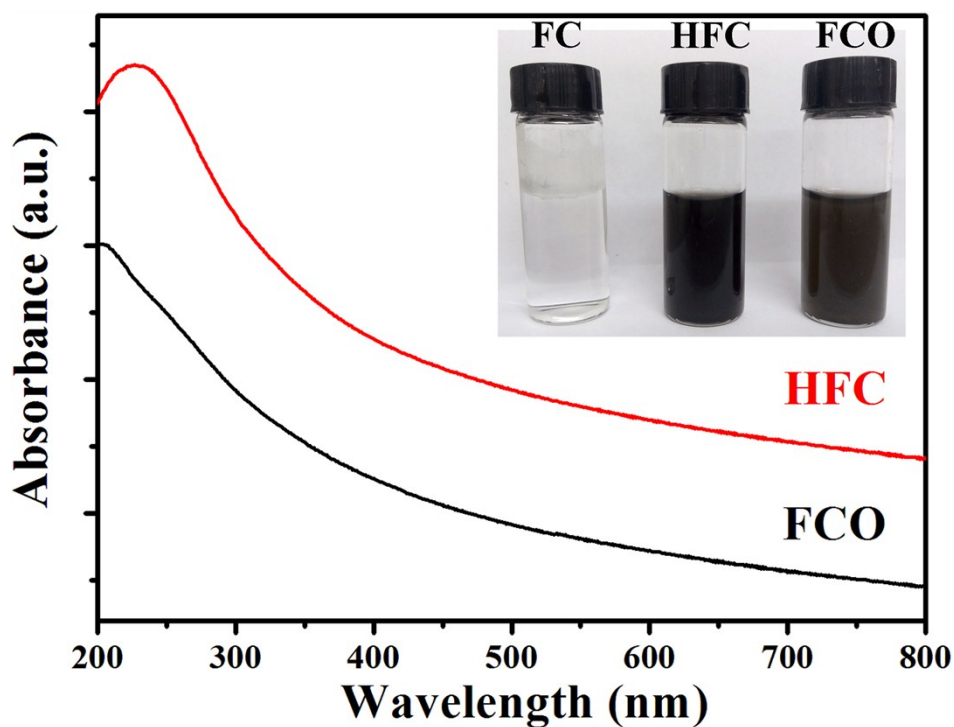

Fig. S2. UV-vis absorption spectra of HFC and FCO (the inset shows the digital image of FC, HFC and FCO dispersed in water).

Fig. S2 showed UV-vis absorption spectra of HFC and FCO, which with excellent hydrophilicity and dispersibility and the inset showed the digital image of FC, HFC and FCO dispersed in water.

### 3. The size distribution histogram of FCO and DLS of the size distribution of FCO

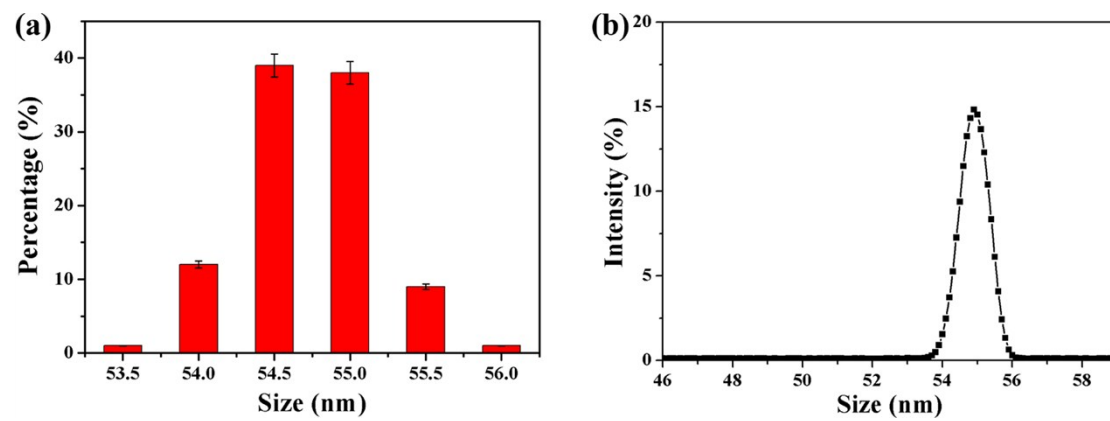

Fig. S3 (a) The size distribution histogram of FCO. (b) The DLS data of FCO.

#### 4. Calculation of the photothermal conversion efficiency ( $\eta$ )

There are many methods to calculate the photothermal conversion efficiency ( $\eta$ ) of photothermal materials<sup>1-5</sup>. In this work, in order to assess  $\eta$ , FCO was continuously irradiated with 1.8 W/cm<sup>2</sup> laser until the solution reached a steady-state temperature, and the variation of the temperature was recorded as a function of time. Subsequently, closed the laser and the temperature of aqueous solution decreased, then the rate of heat transfer from the dispersion system to environment was measured. The  $\eta$  value was calculated using the following eqn (1) and eqn (2):

$$\eta = \frac{hS(T_{\max} - T_{\text{surr}})}{I(1 - 10^{-A_{808}})} \quad (1)$$

$$\tau_s = \frac{m_{\text{H}_2\text{O}}C_{\text{H}_2\text{O}}}{hS} \quad (2)$$

In equations,  $h$  is the heat transfer coefficient,  $S$  is the surface area of the container,  $T_{\max}$  is the equilibrium temperature and  $T_{\text{surr}}$  is the ambient temperature.  $A_{808}$  represents the absorption of FCO at 808 nm, and  $I$  was the incident laser power (1.8 W/cm<sup>2</sup>).  $\tau_s$  is time constant of the sample system,  $m_{\text{H}_2\text{O}}$  is the mass and  $C_{\text{H}_2\text{O}}$  is heat capacity of deionized water deionized water used as the solvent. The  $\eta$  value was 7.71% by calculating the experimental data.

**5. The digital images of FCO-DOX dispersed in PBS and culture medium**

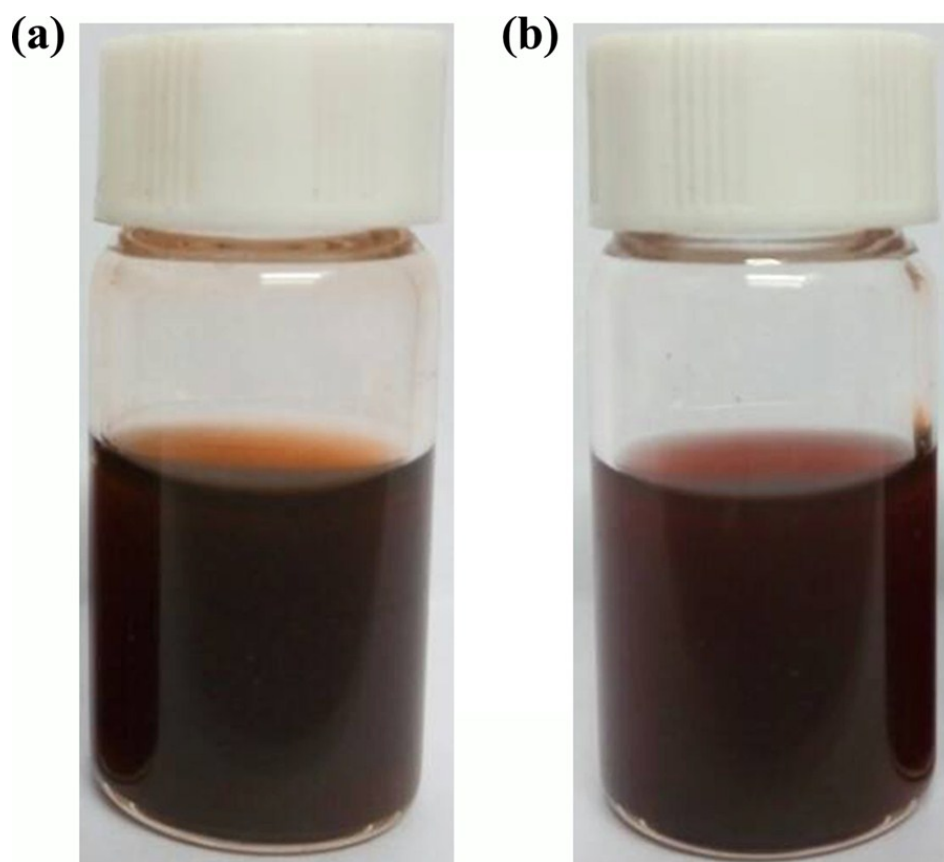

Fig. S5. The digital images of FCO-DOX dispersed in (a) PBS and (b) culture medium.

## 6. The drug release behavior

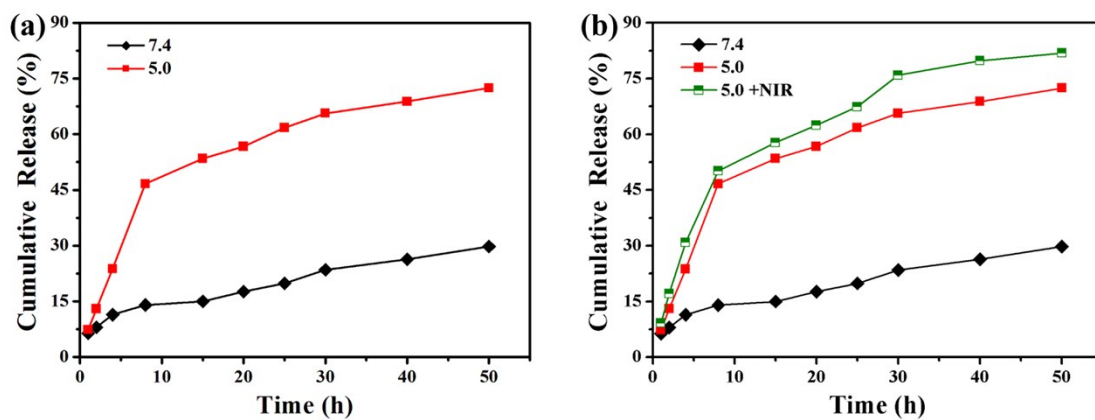

Fig. S6 (a) pH-responsive drug release of FCO-DOX. (b) NIR enhanced drug release.

## 7. The comparison of drug loading efficiency among different carriers

| <b>Drug carrier</b>                                              | <b>Drug</b>               | <b>Drug loading efficiency</b> | <b>Reference documentation</b>                         |
|------------------------------------------------------------------|---------------------------|--------------------------------|--------------------------------------------------------|
| Sodium Alginate Conjugated Graphene Oxide                        | Doxorubicin Hydrochloride | 183.4%                         | Int J Biol Macromol, 2016, 93, 582-590.                |
| Porous Silicon Dioxide                                           | Dexamethasone             | 5.96% -10.77%                  | Experimental Eye Research 129 (2014) 74-82             |
| Zeolitic Imidazolate Framework-8 Coated Hollow Mesoporous Silica | Doxorubicin Hydrochloride | 29.2%                          | J. Mater. Chem. B, 2017, 5, 2126--2132                 |
| Multiwalled Carbon Nanotube-Polyglycolic Acid                    | Doxorubicin Hydrochloride | 152%                           | International Journal of Nanomedicine 2013:8 4427–4440 |
| Poly (Trimethylene Carbonate)-B-Poly(L-Glutamic Acid)            | Doxorubicin Hydrochloride | 47%                            | Journal of Controlled Release 147 (2010) 428–435       |
| Fluorinated Carbon Fiber Oxide                                   | Doxorubicin Hydrochloride | 84%                            | This work                                              |



**8. The fluorescence intensity of the cellular uptake behavior with three parallel samples**

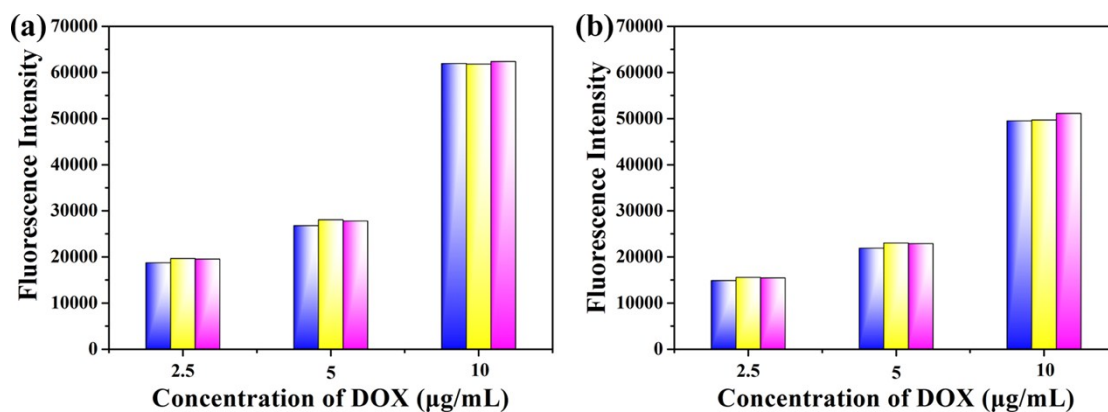

Fig. S8. The fluorescence intensity of (a) free DOX, (b) FCO-DOX obtained from three parallel samples

9. The viabilities of HeLa cells treated with free DOX with laser at  $0.63 \mu\text{g mL}^{-1}$  and untreated cells with laser as FCO-DOX as control.

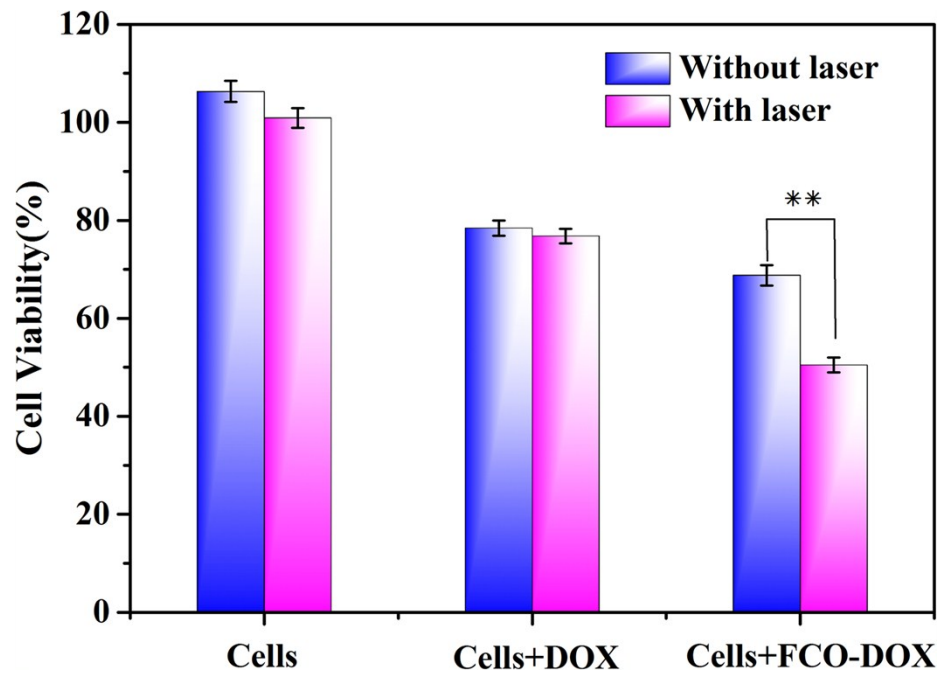

Fig. S9 The viabilities of HeLa cells with laser and cells incubated with free DOX at  $0.63 \mu\text{g mL}^{-1}$  with laser, while FCO-DOX was used as the control. The \*\* indicated

$P < 0.01$ .

## Notes and References

1. D. K. Roper, W. Ahn and M. Hoepfner, *Journal of Physical Chemistry C*, 2007, **111**, 3636-3641.
2. X. Chen, M. Zhang, S. Li, L. Li, L. Zhang, T. Wang, M. Yu, Z. Mou and C. Wang, *Journal of Materials Chemistry B*, 2017, **5**, 1772-1778.
3. C. Sun, L. Wen, J. Zeng, Y. Wang, Q. Sun, L. Deng, C. Zhao and Z. Li, *Biomaterials*, 2016, 91, 81-89.
4. F. Mao, L. Wen, C. Sun, S. Zhang, G. Wang, J. Zeng, Y. Wang, J. Ma, M. Gao and Z. Li, *ACS Nano*, 2016, 10, 11145-11155.
5. L. Wen, L. Chen, S. Zheng, J. Zeng, G. Duan, Y. Wang, G. Wang, Z. Chai, Z. Li and M. Gao, *Advanced Materials*, 2016, 28, 5072-5079.
